# Supplementary material for: Digital Expression Profiling Identifies RUNX2, CDC5L, MDM2, RECQL4, and CDK4 as Potential Predictive Biomarkers for Neo-Adjuvant Chemotherapy Response in Paediatric Osteosarcoma
Source: PLoS One. 2014 May 16;9(5):e95843. doi: 10.1371/journal.pone.0095843 (PMC4023931; doi:10.1371/journal.pone.0095843)
Supplement: Table S3 — Gene expression levels differentiated groups of tumors. The unpaired two-tailed Student’s t-test was applied to derive genes that had significant (p<0.05) differential expression between the group with poor prognosis (n = 25) and the group with good prognosis (n = 15). (XLSX) [file pone.0095843.s005.xlsx]

## Sheet: Sheet1
Gene	266	268	273	278	280	281	291	302	309	315	282	283	290	287	320	296	267	293	349	350	311	274	316	317	301	MEAN	STD	SEM	269	271	289	286	300	303	297	288	310	341	347	348	354	342	314	MEAN	STD	SEM	T-TEST
	POOR	POOR	POOR	POOR	POOR	POOR	POOR	POOR	POOR	POOR	POOR	POOR	POOR	POOR	POOR	POOR	POOR	POOR	POOR	POOR	POOR	POOR	POOR	POOR	POOR				GOOD	GOOD	GOOD	GOOD	GOOD	GOOD	GOOD	GOOD	GOOD	GOOD	GOOD	GOOD	GOOD	GOOD	GOOD
BCL2L1	296.7	192.933	232.3	74.6	127.167	128.4	215.3	855.6	190.8	178.5	849.3	234.45	180.15	190.3	532.9	92.05	109.15	263.9	540.95	347.15	499.25	200.95	592.85	214.8	236.5	303.078	218.229	43.6459	150.2	395.933	206.3	304.35	667.65	385.3	88.6	182.1	270.1	449.8	229.35	842.8	130.1	300.4	346.7	329.979	203.89	52.6443	0.696711
CDC5L	71.3	45.8333	97.8	11.5	37.2	87.3333	127.9	51.1	185.35	50.2	99.15	56.35	40.2	94.6	50.2	207.05	245.6	65.7	426.05	206.45	99.55	51.6	110.35	51.2	24.65	103.769	90.8878	18.1776	99.7	55.3	56.9	166.3	35.35	13.4	16.35	24.35	46.4	56.8	46.25	52.8	11.5	19.2	59.4	50.6667	39.6499	10.2376	0.0154081
CDK4	268.033	311.567	317.3	39.3	118.8	296.367	1594.87	184.7	656.4	166.9	290.45	83.1	464.8	526.75	336.25	3075.55	459.35	215.1	369.65	327.1	3799.05	97.25	2055.85	50.1	381.6	659.447	957.697	191.539	463.467	247.1	135	476.1	138.4	61.45	33.95	39.8	180.7	171.75	187.65	224.8	81.2	121.45	139.8	180.174	133.167	34.3834	0.020861
CDKN1A	810.833	208.133	388.167	162.833	84.1333	127.9	694.7	370.8	1281.1	361.15	889.1	269.5	191.2	223.15	304.3	274.7	116.15	761.2	310.7	785.4	474.7	489.85	881.8	194.15	107.45	430.524	314.598	62.9195	200.5	1291.97	191.133	576.4	498.55	584.9	108.15	35	325.95	1252.2	251.7	518.7	479	587.15	897.9	519.947	379.249	97.9218	0.449402
CDKN1C	161.433	29.7667	19.8667	26.0333	81.8667	198.3	19.6667	180.8	221.65	91.4	237.1	84.2	26.5	117.7	319.2	257.55	126	270.45	777.25	326.55	4.7	62.3	89.9	61.55	43.95	153.427	163.256	32.6513	591.433	252.1	121.2	453.5	222.45	88.4	22.25	24.05	236.05	177.15	28.45	233.7	151	152.1	224.4	198.549	155.739	40.2116	0.390451
CDKN2A	14.0333	2.4	8.93333	5.03333	58.7667	7.46667	38.0333	96.55	112.45	60.7	66.9	9.65	1	86.5	28.6	23.2	1	2.55	35.85	286.85	30.5	13.15	52.85	12.35	6.5	42.4727	60.1705	12.0341	146.467	19.6333	53.1333	355.9	2.2	4.15	5.4	18.5	1.9	46.95	29.35	26.95	4.5	45.7	6.25	51.1322	91.9803	23.7492	0.748165
FOS	2383.5	1824.13	490.167	100.867	1145.57	140.6	2454.3	1086.25	272.35	609.05	759.25	338	862.05	113.35	756.85	27.95	46.7	735.1	3207.05	2147.55	369.45	733.9	711.6	120.45	163.85	863.995	872.265	174.453	495.833	374.567	63.6	303.45	1316.1	230.95	323.05	815.5	291.75	3484.3	1006.55	2263.7	618.6	425.25	4520.8	1102.27	1314.11	339.301	0.538851
HMBS	28.2667	62.7333	66.9333	61.5333	16.7667	76.6	37.8333	67.4	112.25	45.75	76.05	21.05	11.6	129	145.7	45.85	103.85	74.05	151.6	126.05	57.9	33.7	86.75	42.6	53	69.3927	39.5512	7.91023	29.2	51.5667	68.5333	72.05	89.1	48.65	14.45	20.9	43.55	65.35	48.9	90.3	60.3	47.9	63.1	54.2567	22.0695	5.69832	0.12884
MDM2	182.933	108.133	113.6	4.93333	48.7333	85.0667	93.6667	129.75	122.7	220.9	399.65	205.85	48.6	114.5	206.55	41.7	97.45	248.35	338.9	254.5	185.75	265.3	317.05	241.65	99.65	167.035	101.272	20.2543	105.4	486.367	156.5	146.15	444.4	333.2	88.6	68.75	111.95	426.45	141.2	521.6	269.7	407	287.05	266.288	159.944	41.2973	0.0427653
MT-ATP6	50561.7	38590.8	42328.9	35010.3	55994.2	36761.1	42453	34598.3	24238.1	41867.1	28389.6	54487.1	60406.9	24206.3	22374.3	29071.3	26028	27527.8	24498.7	21926	32786.7	38347.8	27969.3	36801	28620.6	35433.8	10942.4	2188.47	52345.9	47456.1	36410	32863.4	32482.2	32867.8	49646.6	59558.7	39112.2	29561.3	39207	32665.3	29412.8	37413.1	33323.2	38955	9126.02	2356.33	0.281259
MT-CO1	51259.6	31765.8	27146.9	36412.3	54643.5	27782	41798.6	31462.2	28824.8	34825.6	33828.9	50098.6	54927.3	24240.5	23665.1	43990.2	28955.2	38826.1	22014.6	29338.7	43047.3	61155.8	32851.3	49408.1	47487.8	37990.3	11124.7	2224.94	47089	32078.5	31607.6	29368.7	25718.2	45603.4	62152.7	45923.7	43009.4	40614.6	38995.3	27495.7	44975.3	44863	37647.8	39809.5	9553.81	2466.78	0.587601
MYC	320.133	145.6	382.767	86.9	171.567	503.933	235.567	604.15	401.55	1021.15	613.7	217.9	80.4	381.3	363.25	402	1475.35	349.45	1604.25	1080.9	313.7	176.8	351.7	216.55	93.25	463.753	409.682	81.9364	498.433	245.4	318.9	351.2	354.3	284.6	82.75	117.65	424.75	308.9	284.7	384.1	130.1	270.9	674.7	315.426	150.822	38.9421	0.111506
PTEN	601.167	245.933	279.833	41.4	180.733	205.233	408.833	299.75	549.9	177.35	600.55	291.3	143.1	455.85	309.6	169	370.85	565	446.55	750.9	228.7	284.1	338.5	232	201.3	335.097	173.257	34.6515	372.967	564.133	327.433	364.15	484.3	326.85	158.85	107.15	750.55	490.3	171.75	347.5	144.1	322.05	449.65	358.782	174.239	44.9883	0.679635
RB1	180.967	137.133	210	23.4667	60.7333	106.967	80.0333	112.9	466.9	22.9	300.1	109.75	59.7	144.85	125.6	131.75	179.4	241.6	249.75	228.75	177.2	109.75	318.75	59.25	109.2	157.896	102.317	20.4634	117.7	168.4	98.2	29.05	191.85	91.7	45.65	21.05	135.6	217.05	56.3	207.05	88.2	111.45	163.35	116.173	63.4815	16.3909	0.119836
RECQL4	47.2	43.1667	149.2	4.9	52.0667	87.3667	27.0333	135.4	89.45	314.2	72	30.7	3.8	82.25	118.5	21.7	194.35	8.75	283.6	174.75	191.35	36.35	89.65	30.65	32.3	92.8273	84.4773	16.8955	78.9667	27.2	92.7667	176.15	16.5	12.25	18.35	54.8	5.65	27.3	70.75	30.45	53.3	49.1	16.05	48.6389	44.001	11.361	0.0363869
RUNX2_P1	704.4	199.4	859.133	38.1	310.5	648.967	1435.77	1454.5	2086.85	435	142.15	158.1	375.8	1465.35	1703.95	1205.5	1282.6	414.9	1895.85	2083.85	935.35	148.2	920.1	92.45	122.3	844.763	673.449	134.69	1349.1	882.967	796.767	1774.1	135.9	169.65	12.45	95.6	1388	173.5	471.05	119.05	283.6	702.85	296.8	576.759	554.461	143.161	0.18166
RUNX2_P2	163.5	27.7	432.133	12.7667	142.433	113.733	220.7	270.1	129.7	387.85	183.05	128	92.95	146.35	183.7	282.35	316.5	68.85	1616.95	314.75	2113.15	99.85	728.65	107.25	229.55	340.501	488.213	97.6426	132.233	142.533	258.833	151.6	109.65	73.45	67.1	183.75	120.15	102.3	159.45	114.25	206.9	216.7	87.15	141.737	55.3329	14.2869	0.0548612
SPARC	16966.9	4480.93	21520.9	817.8	14426.4	12095.5	49268.4	21388.7	23956.1	8431.35	25892.6	12302.5	18023.2	13356.5	26083.7	39906.8	3879.7	36305.2	73738.5	25411.4	22199.4	10661.1	16008.9	12732	12584.2	20897.6	15726.5	3145.29	17171.4	33227.6	30465.4	27367.3	35530.9	13441.4	4230.85	5816.1	42844	22327	11454.2	31551.2	11945.1	38257.3	38844.1	24298.3	12791.6	3302.78	0.460955
SPP1	16281.7	2980	4604.47	874.267	4659.2	373.533	20720.5	9504.9	1742.05	1424.7	1336.4	4145.55	4952.1	1635.3	2503.45	1717.75	3003.55	1580.95	5089.95	2835.55	8158.85	989.6	4489.75	9527.95	3216.6	4733.94	4881.8	976.359	1865.77	19562.5	4731.7	1484.7	6015.55	14869.4	635.5	295.85	14627.7	3711.8	7500.95	688.6	3061.2	5725.35	6846	6108.17	5870.02	1515.63	0.452921
TP53	141.667	27.7667	28.6	10	38.7	269.6	19.1667	23.5	73.3	5.85	168.95	66	13.3	258.3	186.15	24.4	25.85	100.6	45.15	63.5	23.2	81.1	120.6	71.7	19	76.238	75.2843	15.0569	26.6	167.467	83.8667	559.25	87.45	113.25	45.7	7.1	171.75	126.2	30.2	145.35	60.3	127.2	113.75	124.362	130.764	33.763	0.208035
WWOX	66.1333	9.43333	38.8667	1.9	28.5333	38.3333	32.4	66.55	83.05	36.55	59.4	43.8	12.6	45.2	42.95	36.7	51.25	50.4	158.6	93.2	41.6	51.6	129.95	66.7	83.4	54.764	35.0753	7.01505	54	73.7333	46.9	62.3	48.75	50.3	20.3	7.25	110.15	80.6	29.55	45.9	4.5	92.1	41.15	51.1656	29.6906	7.66609	0.731286
